# Supplementary material for: The Influence of Thiol Addition on Selenium Stability and Antioxidant Activity of Beetroot Juice
Source: MDPI journal article supplement (doi:10.3390/app122412634), 2022-12-09
Supplement: s1 [file s1]

## Supplementary material

### The influence of thiol addition on selenium stability and antioxidant activity of beetroot juice

Aleksandra Sentkowska, Krystyna Pyrzynska

**Table S1.** The concentrations of selenium species in beetroot juices without addition of thiols during their storage at different temperatures (in mg L<sup>-1</sup>).

| Se species | Initial                   | Organic beetroot juice    |                           |                           |                           |                           |                           |                           |                           |                           |                           |                           |                           |
|------------|---------------------------|---------------------------|---------------------------|---------------------------|---------------------------|---------------------------|---------------------------|---------------------------|---------------------------|---------------------------|---------------------------|---------------------------|---------------------------|
|            |                           | -19 °C                    |                           |                           |                           | + 4 °C                    |                           |                           |                           | + 20 °C                   |                           |                           |                           |
|            |                           | 2 days                    | 4 days                    | 6 days                    | 8 days                    | 2 days                    | 4 days                    | 6 days                    | 8 days                    | 2 days                    | 4 days                    | 6 days                    | 8 days                    |
| MeSeCys    | 0.29 ± 0.004 <sup>a</sup> | 0.15 ± 0.002 <sup>a</sup> | 0.05 ± 0.001 <sup>b</sup> | < LOD                     | < LOD                     | 0.22 <sup>a</sup> ± 0.003 | 0.13 <sup>b</sup> ± 0.002 | 0.10 <sup>c</sup> ± 0.001 | 0.06 <sup>d</sup> ± 0.001 | 0.10 <sup>a</sup> ± 0.001 | 0.07 <sup>b</sup> ± 0.002 | 0.05 <sup>c</sup> ± 0.003 | < LOD                     |
| SeMet      | 0.11 ± 0.005 <sup>b</sup> | 0.05 <sup>a</sup> ± 0.001 | < LOD                     | < LOD                     | < LOD                     | 0.05 <sup>a</sup> ± 0.002 | < LOD                     | < LOD                     | < LOD                     | 0.08 <sup>a</sup> ± 0.002 | 0.06 <sup>b</sup> ± 0.003 | 0.05 <sup>c</sup> ± 0.002 | < LOD                     |
| SeMetO     | 0.94 ± 0.008 <sup>d</sup> | 4.22 <sup>a</sup> ± 0.093 | 4.73 <sup>b</sup> ± 0.080 | 4.73 <sup>b</sup> ± 0.042 | 7.73 <sup>b</sup> ± 0.033 | 1.13 <sup>a</sup> ± 0.024 | 1.38 <sup>b</sup> ± 0.009 | 3.83 <sup>c</sup> ± 0.041 | 3.98 <sup>d</sup> ± 0.037 | 4.94 <sup>a</sup> ± 0.020 | 5.15 <sup>b</sup> ± 0.025 | 5.18 <sup>b</sup> ± 0.031 | 5.22 <sup>b</sup> ± 0.035 |
| Se (IV)    | 0.45 ± 0.006 <sup>f</sup> | 0.41 <sup>a</sup> ± 0.007 | 0.36 <sup>b</sup> ± 0.005 | 0.31 <sup>c</sup> ± 0.006 | 0.31 <sup>c</sup> ± 0.003 | 0.31 <sup>a</sup> ± 0.005 | 0.27 <sup>b</sup> ± 0.003 | 0.27 <sup>b</sup> ± 0.003 | 0.27 <sup>b</sup> ± 0.004 | 0.30 <sup>a</sup> ± 0.002 | 0.25 <sup>b</sup> ± 0.003 | 0.23 <sup>c</sup> ± 0.004 | 0.23 <sup>c</sup> ± 0.005 |

  

| Se species | Initial                   | Squeezed beetroot juice   |                           |                           |                           |                           |                            |                           |                           |                           |                           |                           |                           |
|------------|---------------------------|---------------------------|---------------------------|---------------------------|---------------------------|---------------------------|----------------------------|---------------------------|---------------------------|---------------------------|---------------------------|---------------------------|---------------------------|
|            |                           | -19 °C                    |                           |                           |                           | + 4 °C                    |                            |                           |                           | + 25 °C                   |                           |                           |                           |
|            |                           | 2 days                    | 4 days                    | 6 days                    | 8 days                    | 2 days                    | 4 days                     | 6 days                    | 8 days                    | 2 days                    | 4 days                    | 6 days                    | 8 days                    |
| MeSeCys    | 0.28 ± 0.003 <sup>a</sup> | 0.22 <sup>a</sup> ± 0.003 | 0.16 <sup>b</sup> ± 0.003 | 0.11 <sup>c</sup> ± 0.004 | 0.09 <sup>d</sup> ± 0.006 | 0.19 <sup>a</sup> ± 0.005 | 0.17 <sup>b</sup> ± 0.004  | 0.13 ± 0.003              | 0.12 ± 0.004              | 0.07 ± 0.002              | 0.05 ± 0.003              | < LOD                     | < LOD                     |
| SeMet      | 0.08 ± 0.001 <sup>c</sup> | < LOD                      | < LOD                     | < LOD                     | < LOD                     | < LOD                     | < LOD                     | < LOD                     |
| SeMetO     | 1.44 ± 0.004 <sup>e</sup> | 1.95 <sup>a</sup> ± 0.070 | 2.03 <sup>a</sup> ± 0.034 | 2.07 <sup>a</sup> ± 0.014 | 2.80 <sup>b</sup> ± 0.011 | 0.77 <sup>a</sup> ± 0.004 | 2.18 <sup>b</sup> ± 0.009  | 2.84 <sup>c</sup> ± 0.012 | 2.90 <sup>c</sup> ± 0.014 | 1.20 <sup>a</sup> ± 0.007 | 2.12 <sup>b</sup> ± 0.009 | 2.21 <sup>c</sup> ± 0.008 | 2.22 <sup>c</sup> ± 0.007 |
| Se (IV)    | 1.73 ± 0.008 <sup>g</sup> | 0.47 <sup>a</sup> ± 0.005 | 0.34 <sup>b</sup> ± 0.015 | 0.33 <sup>b</sup> ± 0.008 | 0.32 <sup>b</sup> ± 0.007 | 0.36 <sup>a</sup> ± 0.004 | 0.283 <sup>b</sup> ± 0.007 | 0.21 <sup>c</sup> ± 0.006 | 0.21 <sup>c</sup> ± 0.005 | 0.42 <sup>a</sup> ± 0.008 | 0.39 <sup>b</sup> ± 0.006 | 0.38 <sup>b</sup> ± 0.008 | 0.39 <sup>b</sup> ± 0.009 |

Results are expressed as mean ± standard deviation (n = 3). Different letters in each row indicate a difference at a significance level of p = 0.05.

**Table S2.** The concentrations of selenium species in beetroot juices with the addition different concentrations of DTT and  $\beta$ ME during their storage in different temperatures (in mg L<sup>-1</sup>).

| <u>Organic beetroot juice</u> |                |                           |                           |                           |                           |                           |                           |                           |                           |                           |                           |                           |                           |                           |
|-------------------------------|----------------|---------------------------|---------------------------|---------------------------|---------------------------|---------------------------|---------------------------|---------------------------|---------------------------|---------------------------|---------------------------|---------------------------|---------------------------|---------------------------|
|                               |                | Initial                   | -19 °C                    |                           |                           |                           | + 4 °C                    |                           |                           |                           | + 20 °C                   |                           |                           |                           |
|                               |                |                           | 2 days                    | 4 days                    | 6 days                    | 8 days                    | 2 days                    | 4 days                    | 6 days                    | 8 days                    | 2 days                    | 4 days                    | 6 days                    | 8 days                    |
| <b>10 mM DTT</b>              | <b>MeSeCys</b> | 0.29 ± 0.004 <sup>a</sup> | 0.18 <sup>a</sup> ± 0.005 | 0.15 <sup>b</sup> ± 0.004 | 0.15 <sup>b</sup> ± 0.003 | 0.14 <sup>b</sup> ± 0.005 | 0.23 <sup>a</sup> ± 0.004 | 0.14 <sup>b</sup> ± 0.005 | 0.14 <sup>c</sup> ± 0.007 | 0.14 <sup>d</sup> ± 0.005 | 0.17 <sup>a</sup> ± 0.007 | 0.10 <sup>b</sup> ± 0.006 | 0.08 <sup>c</sup> ± 0.005 | 0.06 <sup>c</sup> ± 0.007 |
|                               | <b>SeMet</b>   | 0.11 ± 0.005 <sup>b</sup> | 0.08 <sup>a</sup> ± 0.004 | < LOD                     | < LOD                     | < LOD                     | 0.06 <sup>a</sup> ± 0.003 | < LOD                     | < LOD                     | < LOD                     | 0.07 <sup>a</sup> ± 0.003 | < LOD                     | < LOD                     | < LOD                     |
|                               | <b>SeMetO</b>  | 0.94 ± 0.008 <sup>d</sup> | 5.57 <sup>a</sup> ± 0.006 | 5.59 <sup>a</sup> ± 0.003 | 5.89 <sup>b</sup> ± 0.004 | 5.93 <sup>b</sup> ± 0.002 | 2.75 <sup>a</sup> ± 0.010 | 3.92 <sup>b</sup> ± 0.013 | 3.99 <sup>b</sup> ± 0.009 | 4.11 <sup>b</sup> ± 0.015 | 2.40 <sup>a</sup> ± 0.075 | 5.14 <sup>b</sup> ± 0.010 | 5.22 <sup>c</sup> ± 0.015 | 5.29 <sup>c</sup> ± 0.013 |
|                               | <b>Se(IV)</b>  | 0.45 ± 0.006 <sup>f</sup> | 0.44 <sup>a</sup> ± 0.008 | 0.32 <sup>b</sup> ± 0.006 | 0.31 <sup>b</sup> ± 0.005 | 0.31 <sup>b</sup> ± 0.007 | 0.42 <sup>a</sup> ± 0.004 | 0.42 <sup>a</sup> ± 0.002 | 0.41 <sup>b</sup> ± 0.003 | 0.41 <sup>b</sup> ± 0.003 | 0.22 <sup>a</sup> ± 0.010 | 0.21 <sup>a</sup> ± 0.008 | 0.12 <sup>b</sup> ± 0.004 | 0.10 <sup>c</sup> ± 0.002 |
| <b>15 mM DTT</b>              | <b>MeSeCys</b> | 0.29 ± 0.004 <sup>a</sup> | 0.16 <sup>a</sup> ± 0.008 | 0.12 <sup>b</sup> ± 0.004 | 0.12 <sup>c</sup> ± 0.005 | 0.11 <sup>c</sup> ± 0.004 | 0.28 <sup>a</sup> ± 0.006 | 0.19 <sup>b</sup> ± 0.005 | 0.18 <sup>b</sup> ± 0.008 | 0.17 <sup>c</sup> ± 0.007 | 0.13 <sup>a</sup> ± 0.008 | 0.11 <sup>b</sup> ± 0.004 | 0.10 <sup>b</sup> ± 0.005 | < LOD                     |
|                               | <b>SeMet</b>   | 0.11 ± 0.005 <sup>b</sup> | 0.05 <sup>a</sup> ± 0.001 | < LOD                     | < LOD                     | < LOD                     | 0.05 <sup>a</sup> ± 0.003 | < LOD                     | < LOD                     | < LOD                     | 0.06 <sup>a</sup> ± 0.002 | < LOD                     | < LOD                     | < LOD                     |
|                               | <b>SeMetO</b>  | 0.94 ± 0.008 <sup>d</sup> | 1.56 <sup>a</sup> ± 0.012 | 2.73 <sup>b</sup> ± 0.009 | 2.86 <sup>c</sup> ± 0.010 | 2.94 <sup>d</sup> ± 0.011 | 2.50 <sup>a</sup> ± 0.009 | 2.62 <sup>b</sup> ± 0.013 | 2.75 <sup>c</sup> ± 0.017 | 2.89 <sup>d</sup> ± 0.018 | 0.87 <sup>a</sup> ± 0.007 | 1.38 <sup>b</sup> ± 0.010 | 1.52 <sup>c</sup> ± 0.007 | 1.72 <sup>d</sup> ± 0.009 |
|                               | <b>Se(IV)</b>  | 0.45 ± 0.006 <sup>f</sup> | 0.31 <sup>a</sup> ± 0.008 | 0.11 <sup>b</sup> ± 0.010 | 0.10 <sup>c</sup> ± 0.005 | 0.08 <sup>d</sup> ± 0.004 | 0.26 <sup>a</sup> ± 0.013 | 0.13 <sup>b</sup> ± 0.009 | 0.10 <sup>c</sup> ± 0.008 | 0.09 <sup>c</sup> ± 0.006 | 0.36 <sup>a</sup> ± 0.005 | 0.19 <sup>b</sup> ± 0.004 | 0.13 <sup>c</sup> ± 0.008 | 0.16 <sup>d</sup> ± 0.012 |
| <b>20 mM DTT</b>              | <b>MeSeCys</b> | 0.29 ± 0.004 <sup>a</sup> | 0.27 <sup>a</sup> ± 0.012 | 0.26 <sup>a</sup> ± 0.009 | 0.16 <sup>b</sup> ± 0.003 | 0.11 <sup>d</sup> ± 0.007 | 0.27 <sup>a</sup> ± 0.008 | 0.20 <sup>b</sup> ± 0.003 | 0.17 <sup>c</sup> ± 0.005 | 0.12 <sup>d</sup> ± 0.006 | 0.15 <sup>a</sup> ± 0.009 | 0.13 <sup>b</sup> ± 0.005 | 0.13 <sup>b</sup> ± 0.008 | 0.12 <sup>c</sup> ± 0.004 |
|                               | <b>SeMet</b>   | 0.11 ± 0.005 <sup>b</sup> | 0.05 <sup>a</sup> ± 0.003 | < LOD                     | < LOD                     | < LOD                     | 0.06 <sup>a</sup> ± 0.002 | < LOD                     | < LOD                     | < LOD                     | 0.05 <sup>a</sup> ± 0.003 | < LOD                     | < LOD                     | < LOD                     |
|                               | <b>SeMetO</b>  | 0.94 ± 0.008 <sup>d</sup> | 2.69 <sup>a</sup> ± 0.015 | 2.72 <sup>a</sup> ± 0.011 | 2.84 <sup>c</sup> ± 0.012 | 2.94 <sup>d</sup> ± 0.009 | 0.09 <sup>a</sup> ± 0.004 | 1.96 <sup>b</sup> ± 0.017 | 2.06 <sup>b</sup> ± 0.013 | 2.36 <sup>c</sup> ± 0.017 | 3.38 <sup>a</sup> ± 0.023 | 3.94 <sup>b</sup> ± 0.008 | 4.06 <sup>c</sup> ± 0.011 | 4.18 <sup>d</sup> ± 0.012 |
|                               | <b>Se(IV)</b>  | 0.45 ± 0.006 <sup>f</sup> | 0.29 <sup>a</sup> ± 0.009 | 0.28 <sup>a</sup> ± 0.010 | 0.25 <sup>b</sup> ± 0.005 | 0.25 <sup>b</sup> ± 0.009 | 0.39 <sup>a</sup> ± 0.011 | 0.23 <sup>b</sup> ± 0.015 | 0.21 <sup>c</sup> ± 0.003 | 0.20 <sup>d</sup> ± 0.006 | 0.31 <sup>a</sup> ± 0.012 | 0.28 <sup>b</sup> ± 0.009 | 0.26 <sup>c</sup> ± 0.013 | 0.25 <sup>d</sup> ± 0.015 |

**Organic beetroot juice**

|               |         | Initial                      | -19 °C                       |                              |                              |                              | +4 °C                        |                              |                              |                              | + 20 °C                      |                              |                              |                              |
|---------------|---------|------------------------------|------------------------------|------------------------------|------------------------------|------------------------------|------------------------------|------------------------------|------------------------------|------------------------------|------------------------------|------------------------------|------------------------------|------------------------------|
|               |         |                              | 2 days                       | 4 days                       | 6 days                       | 8 days                       | 2 days                       | 4 days                       | 6 days                       | 8 days                       | 2 days                       | 4 days                       | 6 days                       | 8 days                       |
| 0.05 %<br>βME | MeSeCys | 0.29 ±<br>0.004 <sup>a</sup> | 0.23 <sup>a</sup> ±<br>0.010 | 0.17 <sup>b</sup> ±<br>0.003 | < LOD                        | < LOD                        | 0.23 <sup>a</sup> ±<br>0.011 | 0.29 <sup>b</sup> ±<br>0.008 | < LOD                        | < LOD                        | 0.11 <sup>a</sup> ±<br>0.006 | 0.26 <sup>b</sup> ±<br>0.005 | < LOD                        | < LOD                        |
|               | SeMet   | 0.11 ±<br>0.005 <sup>b</sup> | 0.07 <sup>a</sup> ±<br>0.003 | 0.05 <sup>a</sup> ±<br>0.002 | < LOD                        | < LOD                        | 0.07 <sup>a</sup> ±<br>0.002 | < LOD                        | < LOD                        | < LOD                        | 0.05 <sup>a</sup> ±<br>0.002 | < LOD                        | < LOD                        | < LOD                        |
|               | SeMetO  | 0.94 ±<br>0.008 <sup>d</sup> | 1.04 <sup>a</sup> ±<br>0.006 | 1.63 <sup>b</sup> ±<br>0.008 | < LOD                        | < LOD                        | 1.04 <sup>a</sup> ±<br>0.003 | 1.81 <sup>b</sup> ±<br>0.004 | < LOD                        | < LOD                        | 4.49 <sup>a</sup> ±<br>0.012 | 2.51 <sup>b</sup> ±<br>0.010 | < LOD                        | < LOD                        |
|               | Se(IV)  | 0.45 ±<br>0.006 <sup>f</sup> | 0.41 <sup>a</sup> ±<br>0.005 | 0.17 <sup>b</sup> ±<br>0.002 | < LOD                        | < LOD                        | 0.41 <sup>a</sup> ±<br>0.006 | 0.22 <sup>b</sup> ±<br>0.001 | < LOD                        | < LOD                        | 0.28 <sup>a</sup> ±<br>0.005 | 0.14 <sup>b</sup> ±<br>0.003 | < LOD                        | < LOD                        |
| 0.10 %<br>βME | MeSeCys | 0.29 ±<br>0.004 <sup>a</sup> | 0.20 <sup>a</sup> ±<br>0.002 | 0.20 <sup>a</sup> ±<br>0.002 | < LOD                        | < LOD                        | 0.20 <sup>a</sup> ±<br>0.001 | 0.22 <sup>a</sup> ±<br>0.003 | < LOD                        | < LOD                        | 0.15 <sup>a</sup> ±<br>0.002 | 0.16 <sup>a</sup> ±<br>0.002 | < LOD                        | < LOD                        |
|               | SeMet   | 0.11 ±<br>0.005 <sup>b</sup> | 0.05 <sup>a</sup> ±<br>0.001 | < LOD                        | < LOD                        | < LOD                        | 0.05 <sup>a</sup> ±<br>0.001 | < LOD                        | < LOD                        | < LOD                        | 0.05 <sup>a</sup><br>±0.001  | < LOD                        | < LOD                        | < LOD                        |
|               | SeMetO  | 0.94 ±<br>0.008 <sup>d</sup> | 1.53 <sup>a</sup> ±<br>0.011 | 2.66 <sup>b</sup> ±<br>0.012 | 2.89 <sup>c</sup><br>±0.009  | 3.01 <sup>d</sup> ±<br>0.015 | 1.54 <sup>a</sup> ±<br>0.013 | 1.76 <sup>b</sup> ±<br>0.011 | 1.98 <sup>c</sup> ±<br>0.009 | 2.16 <sup>d</sup> ±<br>0.014 | 4.17 <sup>a</sup> ±<br>0.020 | 4.40 <sup>b</sup> ±<br>0.021 | 4.42 <sup>b</sup> ±<br>0.019 | 4.45 <sup>c</sup> ±<br>0.013 |
|               | Se(IV)  | 0.45 ±<br>0.006 <sup>f</sup> | 0.19 <sup>a</sup> ±<br>0.007 | 0.24 <sup>b</sup> ±<br>0.003 | 0.25 <sup>b</sup> ±<br>0.006 | 0.25 <sup>b</sup> ±<br>0.005 | 0.19 <sup>a</sup> ±<br>0.001 | 0.29 <sup>b</sup> ±<br>0.003 | 0.28 <sup>b</sup> ±<br>0.004 | 0.30 <sup>b</sup> ±<br>0.003 | 0.19 <sup>a</sup> ±<br>0.002 | 0.27 <sup>b</sup> ±<br>0.003 | 0.30 <sup>c</sup> ±<br>0.004 | 0.32 <sup>c</sup> ±<br>0.003 |
| 0.15%<br>βME  | MeSeCys | 0.29 ±<br>0.004 <sup>a</sup> | 0.21 <sup>a</sup> ±<br>0.001 | 0.19 <sup>a</sup> ±<br>0.002 | 0.15 <sup>b</sup> ±<br>0.001 | 0.10 <sup>c</sup> ±<br>0.001 | 0.21 <sup>a</sup> ±<br>0.003 | 0.23 <sup>a</sup> ±<br>0.002 | 0.23 <sup>a</sup> ±<br>0.001 | 0.22 <sup>a</sup> ±<br>0.001 | 0.10 <sup>a</sup> ±<br>0.001 | 0.17 <sup>b</sup> ±<br>0.003 | 0.15 <sup>b</sup> ±<br>0.002 | 0.14 <sup>b</sup> ±<br>0.002 |
|               | SeMet   | 0.11 ±<br>0.005 <sup>b</sup> | < LOD                        | < LOD                        | < LOD                        | < LOD                        | 0.05 <sup>a</sup> ±<br>0.001 | < LOD                        | < LOD                        | < LOD                        | 0.06 <sup>a</sup> ±          | < LOD                        | < LOD                        | < LOD                        |
|               | SeMetO  | 0.94 ±<br>0.008 <sup>d</sup> | 1.19 <sup>a</sup> ±<br>0.005 | 1.82 <sup>b</sup> ±<br>0.003 | 1.82 <sup>b</sup> ±<br>0.004 | 1.85 <sup>b</sup> ±<br>0.005 | 1.19 <sup>a</sup> ±<br>0.004 | 1.48 <sup>b</sup> ±<br>0.005 | 1.52 <sup>c</sup> ±<br>0.005 | 1.57 <sup>c</sup> ±<br>0.006 | 0.81 <sup>a</sup> ±<br>0.001 | 1.64 <sup>b</sup> ±<br>0.002 | 1.68 <sup>b</sup><br>±0.003  | 1.70 <sup>b</sup> ±<br>0.002 |
|               | Se (IV) | 0.45 ±<br>0.006 <sup>f</sup> | 0.22 <sup>a</sup> ±<br>0.004 | 0.22 <sup>a</sup> ±<br>0.002 | 0.25 <sup>b</sup> ±<br>0.001 | 0.24 <sup>b</sup> ±<br>0.002 | 0.22 <sup>a</sup> ±<br>0.003 | 0.13 <sup>b</sup> ±<br>0.002 | 0.15 <sup>b</sup> ±<br>0.001 | 0.15 <sup>b</sup> ±<br>0.002 | 0.20 <sup>a</sup> ±<br>0.003 | 0.13 <sup>b</sup> ±<br>0.002 | 0.15 <sup>b</sup><br>±0.003  | 0.18 <sup>c</sup> ±<br>0.001 |

**Squeezed beetroot juice**

|                  |                | Initial                   | -19 °C                    |                           |                           |                           | + 4 °C                    |                           |                           |                           | + 20 °C                   |                           |                           |                           |
|------------------|----------------|---------------------------|---------------------------|---------------------------|---------------------------|---------------------------|---------------------------|---------------------------|---------------------------|---------------------------|---------------------------|---------------------------|---------------------------|---------------------------|
|                  |                |                           | 2 days                    | 4 days                    | 6 days                    | 8 days                    | 2 days                    | 4 days                    | 6 days                    | 8 days                    | 2 days                    | 4 days                    | 6 days                    | 8 days                    |
| <b>10 mM DTT</b> | <b>MeSeCys</b> | 0.28 ± 0.003 <sup>a</sup> | 0.26 <sup>a</sup> ± 0.002 | 0.14 <sup>b</sup> ± 0.001 | 0.11 <sup>b</sup> ± 0.001 | 0.05 <sup>c</sup> ± 0.001 | 0.24 <sup>a</sup> ± 0.004 | 0.17 <sup>b</sup> ± 0.002 | 0.14 <sup>c</sup> ± 0.001 | 0.10 <sup>d</sup> ± 0.001 | 0.09 <sup>a</sup> ± 0.001 | 0.10 <sup>a</sup> ± 0.001 | 0.07 <sup>b</sup> ± 0.001 | 0.05 <sup>b</sup> ± 0.001 |
|                  | <b>SeMet</b>   | 0.08 ± 0.001 <sup>c</sup> | < LOD                     | < LOD                     | < LOD                     | < LOD                     | 0.05 <sup>a</sup> ± 0.001 | < LOD                     | < LOD                     | < LOD                     | 0.06 <sup>a</sup> ± 0.001 | < LOD                     | < LOD                     | < LOD                     |
|                  | <b>SeMetO</b>  | 1.44 ± 0.004 <sup>e</sup> | 1.97 <sup>a</sup> ± 0.010 | 3.67 <sup>b</sup> ± 0.013 | 3.66 <sup>b</sup> ± 0.011 | 3.68 <sup>b</sup> ± 0.015 | 1.39 <sup>a</sup> ± 0.013 | 1.52 <sup>b</sup> ± 0.012 | 1.74 <sup>c</sup> ± 0.013 | 1.80 <sup>d</sup> ± 0.011 | 0.78 <sup>a</sup> ± 0.007 | 2.43 <sup>b</sup> ± 0.011 | 2.53 <sup>c</sup> ± 0.013 | 2.60 <sup>d</sup> ± 0.014 |
|                  | <b>Se(IV)</b>  | 1.73 ± 0.008 <sup>g</sup> | 0.34 <sup>a</sup> ± 0.001 | 0.34 <sup>a</sup> ± 0.003 | 0.35 <sup>a</sup> ± 0.001 | 0.36 <sup>a</sup> ± 0.002 | 0.33 <sup>a</sup> ± 0.003 | 0.35 <sup>a</sup> ± 0.002 | 0.42 <sup>a</sup> ± 0.003 | 0.48 <sup>a</sup> ± 0.004 | 0.44 <sup>a</sup> ± 0.003 | 1.19 <sup>b</sup> ± 0.006 | 1.27 <sup>c</sup> ± 0.005 | 1.32 <sup>d</sup> ± 0.003 |
| <b>15 mM DTT</b> | <b>MeSeCys</b> | 0.28 ± 0.003 <sup>a</sup> | 0.27 <sup>a</sup> ± 0.002 | 0.16 <sup>b</sup> ± 0.001 | 0.15 <sup>b</sup> ± 0.001 | 0.13 <sup>c</sup> ± 0.002 | 0.22 <sup>a</sup> ± 0.003 | 0.18 <sup>b</sup> ± 0.001 | 0.11 <sup>c</sup> ± 0.001 | 0.05 <sup>d</sup> ± 0.001 | 0.12 <sup>a</sup> ± 0.002 | 0.13 <sup>a</sup> ± 0.002 | 0.10 <sup>b</sup> ± 0.001 | 0.08 <sup>c</sup> ± 0.001 |
|                  | <b>SeMet</b>   | 0.08 ± 0.001 <sup>c</sup> | < LOD                     | < LOD                     | < LOD                     | < LOD                     | 0.06 <sup>a</sup> ± 0.001 | 0.05 <sup>a</sup> ± 0.001 | < LOD                     |
|                  | <b>SeMetO</b>  | 1.44 ± 0.004 <sup>e</sup> | 1.66 <sup>a</sup> ± 0.003 | 3.81 <sup>a</sup> ± 0.010 | 3.80 <sup>a</sup> ± 0.012 | 3.82 <sup>a</sup> ± 0.014 | 1.92 <sup>a</sup> ± 0.012 | 2.48 <sup>b</sup> ± 0.011 | 2.55 <sup>c</sup> ± 0.013 | 2.63 <sup>d</sup> ± 0.011 | 1.74 <sup>a</sup> ± 0.09  | 2.20 <sup>b</sup> ± 0.014 | 2.25 <sup>b</sup> ± 0.012 | 2.30 <sup>b</sup> ± 0.010 |
|                  | <b>Se(IV)</b>  | 1.73 ± 0.008 <sup>g</sup> | 0.18 <sup>a</sup> ± 0.005 | 1.09 <sup>b</sup> ± 0.009 | 1.30 <sup>c</sup> ± 0.010 | 1.35 <sup>b</sup> ± 0.013 | 0.34 <sup>a</sup> ± 0.005 | 2.17 <sup>b</sup> ± 0.011 | 2.23 <sup>c</sup> ± 0.013 | 2.30 <sup>d</sup> ± 0.011 | 0.50 <sup>a</sup> ± 0.008 | 1.52 <sup>b</sup> ± 0.007 | 1.80 <sup>c</sup> ± 0.008 | 1.87 <sup>d</sup> ± 0.006 |
| <b>20 mM DTT</b> | <b>MeSeCys</b> | 0.28 ± 0.003 <sup>a</sup> | 0.20 <sup>a</sup> ± 0.003 | 0.20 <sup>a</sup> ± 0.002 | 0.19 <sup>a</sup> ± 0.001 | 0.18 <sup>a</sup> ± 0.002 | 0.19 <sup>a</sup> ± 0.001 | 0.10 <sup>b</sup> ± 0.003 | 0.05 <sup>c</sup> ± 0.001 | < LOD                     | 0.14 <sup>a</sup> ± 0.002 | 0.06 <sup>b</sup> ± 0.002 | 0.05 <sup>b</sup> ± 0.001 | < LOD                     |
|                  | <b>SeMet</b>   | 0.08 ± 0.001 <sup>c</sup> | < LOD                     | < LOD                     | < LOD                     | < LOD                     | 0.05 <sup>a</sup> ± 0.001 | < LOD                     |
|                  | <b>SeMetO</b>  | 1.44 ± 0.004 <sup>e</sup> | 2.38 <sup>a</sup> ± 0.013 | 2.41 <sup>b</sup> ± 0.022 | 2.40 <sup>b</sup> ± 0.011 | 2.40 <sup>b</sup> ± 0.013 | 2.24 <sup>a</sup> ± 0.014 | 2.96 <sup>b</sup> ± 0.012 | 3.03 <sup>c</sup> ± 0.014 | 3.15 <sup>d</sup> ± 0.011 | 4.17 <sup>a</sup> ± 0.021 | 4.16 <sup>a</sup> ± 0.019 | 4.20 <sup>b</sup> ± 0.018 | 4.21 <sup>b</sup> ± 0.017 |
|                  | <b>Se(IV)</b>  | 1.73 ± 0.008 <sup>g</sup> | 1.33 <sup>a</sup> ± 0.015 | 1.51 <sup>b</sup> ± 0.016 | 1.50 <sup>b</sup> ± 0.014 | 1.51 <sup>b</sup> ± 0.012 | 0.33 <sup>a</sup> ± 0.009 | 0.34 <sup>a</sup> ± 0.007 | 0.82 <sup>b</sup> ± 0.010 | 0.83 <sup>b</sup> ± 0.008 | 1.33 <sup>a</sup> ± 0.011 | 1.43 <sup>b</sup> ± 0.013 | 1.40 <sup>b</sup> ± 0.014 | 1.41 <sup>b</sup> ± 0.012 |

Organic beetroot juice

|               |         | Initial                      | -19 °C                       |                              |                              |                              | +4 °C                        |                              |                              |                              | + 20 °C                      |                              |                              |                              |
|---------------|---------|------------------------------|------------------------------|------------------------------|------------------------------|------------------------------|------------------------------|------------------------------|------------------------------|------------------------------|------------------------------|------------------------------|------------------------------|------------------------------|
|               |         |                              | 2 days                       | 4 days                       | 6 days                       | 8 days                       | 2 days                       | 4 days                       | 6 days                       | 8 days                       | 2 days                       | 4 days                       | 6 days                       | 8 days                       |
| 0.05 %<br>βME | MeSeCys | 0.28 ±<br>0.003 <sup>a</sup> | 0.16 <sup>a</sup> ±<br>0.007 | 0.14 <sup>a</sup> ±<br>0.005 | 0.11 <sup>b</sup> ±<br>0.003 | 0.07 <sup>c</sup> ±<br>0.001 | 0.22 <sup>a</sup> ±<br>0.004 | 0.17 <sup>b</sup> ±<br>0.003 | 0.15 <sup>b</sup> ±<br>0.002 | 0.12 <sup>c</sup> ±<br>0.001 | 0.18 <sup>a</sup> ±<br>0.003 | 0.16 <sup>b</sup> ±<br>0.002 | 0.09 <sup>c</sup> ±<br>0.001 | < LOD                        |
|               | SeMet   | 0.08 ±<br>0.001 <sup>c</sup> | < LOD                        | < LOD                        | < LOD                        | < LOD                        | 0.06 ±<br>0.001              | < LOD                        |
|               | SeMetO  | 1.44 ±<br>0.004 <sup>e</sup> | 1.19 <sup>a</sup> ±<br>0.010 | 2.07 <sup>b</sup> ±<br>0.015 | 2.13 <sup>c</sup> ±<br>0.013 | 2.36 <sup>d</sup> ±<br>0.014 | 2.44 <sup>a</sup> ±<br>0.013 | 2.80 <sup>b</sup> ±<br>0.015 | 2.87 <sup>c</sup> ±<br>0.019 | 2.92 <sup>d</sup> ±<br>0.015 | 2.89 <sup>a</sup> ±<br>0.013 | 3.07 <sup>b</sup> ±<br>0.012 | 3.15 <sup>c</sup> ±<br>0.011 | 3.30 <sup>d</sup> ±<br>0.012 |
|               | Se (IV) | 1.73 ±<br>0.008 <sup>g</sup> | 1.11 <sup>a</sup> ±<br>0.009 | 0.95 <sup>b</sup> ±<br>0.007 | 0.99 <sup>c</sup> ±<br>0.002 | 1.01 <sup>c</sup> ±<br>0.003 | 1.51 <sup>a</sup> ±<br>0.013 | 2.75 <sup>b</sup> ±<br>0.015 | 2.80 <sup>c</sup> ±<br>0.016 | 2.83 <sup>c</sup> ±<br>0.017 | 1.28 <sup>a</sup> ±<br>0.018 | 2.32 <sup>b</sup> ±<br>0.015 | 2.30 <sup>b</sup> ±<br>0.017 | 2.32 <sup>b</sup> ±<br>0.014 |
| 0.10 %<br>βME | MeSeCys | 0.28 ±<br>0.003 <sup>a</sup> | 0.25 <sup>a</sup> ±<br>0.008 | 0.17 <sup>b</sup> ±<br>0.005 | 0.15 <sup>b</sup> ±<br>0.003 | 0.12 <sup>c</sup> ±<br>0.002 | 0.20 <sup>a</sup> ±<br>0.009 | 0.14 <sup>b</sup> ±<br>0.005 | 0.11 <sup>c</sup> ±<br>0.003 | 0.09 <sup>c</sup> ±<br>0.001 | 0.12 <sup>a</sup> ±<br>0.002 | 0.13 <sup>a</sup> ±<br>0.002 | 0.13 <sup>a</sup> ±<br>0.003 | 0.13 <sup>a</sup><br>±0.001  |
|               | SeMet   | 0.08 ±<br>0.001 <sup>c</sup> | < LOD                        | < LOD                        | < LOD                        | < LOD                        | 0.07 <sup>a</sup> ±<br>0.001 | < LOD                        |
|               | SeMetO  | 1.44 ±<br>0.004 <sup>e</sup> | 1.18 <sup>a</sup> ±<br>0.010 | 2.34 <sup>b</sup> ±<br>0.015 | 2.40 <sup>c</sup> ±<br>0.017 | 2.49 <sup>c</sup> ±<br>0.014 | 1.58 <sup>a</sup> ±<br>0.010 | 3.60 <sup>b</sup> ±<br>0.011 | 3.61 <sup>b</sup> ±<br>0.012 | 3.62 <sup>b</sup> ±<br>0.015 | 1.47 <sup>a</sup> ±<br>0.010 | 3.30 <sup>b</sup> ±<br>0.011 | 3.29 <sup>b</sup> ±<br>0.012 | 3.30 <sup>b</sup> ±<br>0.015 |
|               | Se(IV)  | 1.73 ±<br>0.008 <sup>g</sup> | 1.14 <sup>a</sup> ±<br>0.004 | 1.48 <sup>b</sup> ±<br>0.008 | 1.54 <sup>c</sup> ±<br>0.010 | 1.61 <sup>c</sup> ±<br>0.012 | 1.12 <sup>a</sup> ±<br>0.009 | 2.60 <sup>b</sup> ±<br>0.015 | 2.63 <sup>b</sup><br>±0.017  | 2.65 <sup>b</sup> ±<br>0.015 | 1.50 <sup>a</sup> ±<br>0.008 | 1.99 <sup>b</sup> ±<br>0.009 | 2.02 <sup>b</sup> ±<br>0.010 | 2.03 <sup>b</sup> ±<br>0.011 |
| 0.15%<br>βME  | MeSeCys | 0.28 ±<br>0.003 <sup>a</sup> | 0.27 <sup>a</sup> ±<br>0.011 | 0.23 <sup>a</sup> ±<br>0.010 | 0.24 <sup>a</sup> ±<br>0.009 | 0.25 <sup>a</sup> ±<br>0.007 | 0.14 <sup>a</sup> ±<br>0.002 | 0.15 <sup>a</sup> ±<br>0.002 | 0.11 <sup>b</sup> ±<br>0.003 | 0.09 <sup>b</sup> ±<br>0.001 | 0.14 <sup>a</sup> ±<br>0.002 | 0.09 <sup>b</sup> ±<br>0.002 | 0.05 <sup>c</sup> ±<br>0.001 | < LOD                        |
|               | SeMet   | 0.08 ±<br>0.001 <sup>c</sup> | < LOD                        | < LOD                        | < LOD                        | < LOD                        | 0.09 <sup>a</sup> ±<br>0.002 | < LOD                        | < LOD                        | < LOD                        | 0.09 <sup>a</sup> ±<br>0.001 | 0.05 <sup>b</sup> ±<br>0.001 | < LOD                        | < LOD                        |
|               | SeMetO  | 1.44 ±<br>0.004 <sup>e</sup> | 0.51 <sup>a</sup> ±<br>0.007 | 2.07 <sup>b</sup> ±<br>0.008 | 2.13 <sup>c</sup> ±<br>0.005 | 2.18 <sup>d</sup> ±<br>0.007 | 1.48 <sup>a</sup> ±<br>0.007 | 4.27 <sup>b</sup> ±<br>0.016 | 4.30 <sup>b</sup> ±<br>0.017 | 4.31 <sup>b</sup> ±<br>0.022 | 1.57 <sup>a</sup> ±<br>0.014 | 5.99 <sup>b</sup> ±<br>0.023 | 5.98 <sup>b</sup> ±<br>0.019 | 5.97 <sup>b</sup> ±<br>0.020 |
|               | Se(IV)  | 1.73 ±<br>0.008 <sup>g</sup> | 0.66 <sup>a</sup> ±<br>0.003 | 1.06 <sup>b</sup> ±<br>0.002 | 1.10 <sup>b</sup> ±<br>0.001 | 1.10 <sup>b</sup> ±<br>0.002 | 1.22 <sup>a</sup> ±<br>0.007 | 2.84 <sup>b</sup> ±<br>0.008 | 2.85 <sup>b</sup> ±<br>0.007 | 2.84 <sup>b</sup> ±<br>0.009 | 1.60 <sup>a</sup> ±<br>0.005 | 1.83 <sup>b</sup> ±<br>0.004 | 1.85 <sup>b</sup> ±<br>0.003 | 1.87 <sup>b</sup> ±<br>0.002 |

Results are expressed as mean ± standard deviation (n = 3). Different letters in each row indicate a difference at a significance level of  $p = 0.05$ . Different letters in first column indicate the significant difference between the concentration of the same compound detected in two different juices.

**Table S3.** The antioxidant activity of beetroot juices in DPPH assay after addition of DTT and ME and stored at different temperatures.

| <b>Organic beetroot juice</b>  |                |                            |                            |                            |                            |                            |                            |                            |                            |                            |                            |                            |                            |
|--------------------------------|----------------|----------------------------|----------------------------|----------------------------|----------------------------|----------------------------|----------------------------|----------------------------|----------------------------|----------------------------|----------------------------|----------------------------|----------------------------|
| <b>Addition</b>                | <b>Initial</b> | <b>-19 °C</b>              |                            |                            |                            | <b>+ 4 °C</b>              |                            |                            |                            | <b>+ 20 °C</b>             |                            |                            |                            |
|                                |                | <b>2 days</b>              | <b>4 days</b>              | <b>6 days</b>              | <b>8 days</b>              | <b>2 days</b>              | <b>4 days</b>              | <b>6 days</b>              | <b>8 days</b>              | <b>2 days</b>              | <b>4 days</b>              | <b>6 days</b>              | <b>8 days</b>              |
| <b>10 mM DTT</b>               | 0.75 ± 0.037   | 0.763 ± 0.032 <sup>a</sup> | 0.532 ± 0.023 <sup>b</sup> | 0.385 ± 0.013 <sup>c</sup> | 0.219 ± 0.011 <sup>d</sup> | 0.671 ± 0.027 <sup>a</sup> | 0.464 ± 0.022 <sup>b</sup> | 0.378 ± 0.017 <sup>c</sup> | 0.202 ± 0.013 <sup>d</sup> | 0.783 ± 0.039 <sup>a</sup> | 0.563 ± 0.027 <sup>b</sup> | 0.306 ± 0.022 <sup>c</sup> | 0.268 ± 0.018 <sup>d</sup> |
| <b>15 mM DTT</b>               | 0.75 ± 0.037   | 0.581 ± 0.022 <sup>a</sup> | 0.440 ± 0.018 <sup>b</sup> | 0.212 ± 0.010 <sup>c</sup> | 0.194 ± 0.008 <sup>d</sup> | 0.618 ± 0.025 <sup>a</sup> | 0.598 ± 0.017 <sup>b</sup> | 0.429 ± 0.013 <sup>c</sup> | 0.341 ± 0.011 <sup>d</sup> | 0.889 ± 0.023 <sup>a</sup> | 0.606 ± 0.031 <sup>b</sup> | 0.425 ± 0.027 <sup>c</sup> | 0.391 ± 0.023 <sup>d</sup> |
| <b>20 mM DTT</b>               | 0.75 ± 0.037   | 0.636 ± 0.030 <sup>a</sup> | 0.487 ± 0.023 <sup>b</sup> | 0.350 ± 0.015 <sup>c</sup> | 0.150 ± 0.010 <sup>d</sup> | 0.674 ± 0.031 <sup>a</sup> | 0.542 ± 0.018 <sup>a</sup> | 0.545 ± 0.015 <sup>b</sup> | 0.333 ± 0.013 <sup>c</sup> | 0.873 ± 0.028 <sup>a</sup> | 0.468 ± 0.018 <sup>b</sup> | 0.450 ± 0.015 <sup>b</sup> | 0.422 ± 0.011 <sup>c</sup> |
| <b>0.05 % βME</b>              | 0.75 ± 0.037   | 0.511 ± 0.016 <sup>a</sup> | 0.388 ± 0.012 <sup>b</sup> | 0.288 ± 0.010 <sup>c</sup> | 0.089 ± 0.003 <sup>d</sup> | 0.459 ± 0.026 <sup>a</sup> | 0.346 ± 0.012 <sup>b</sup> | 0.271 ± 0.010 <sup>c</sup> | 0.195 ± 0.009 <sup>d</sup> | 0.690 ± 0.025 <sup>a</sup> | 0.307 ± 0.013 <sup>b</sup> | 0.293 ± 0.010 <sup>c</sup> | 0.275 ± 0.015 <sup>d</sup> |
| <b>0.10 % βME</b>              | 0.75 ± 0.037   | 0.502 ± 0.010 <sup>a</sup> | 0.470 ± 0.011 <sup>b</sup> | 0.425 ± 0.009 <sup>c</sup> | 0.042 ± 0.010 <sup>d</sup> | 0.573 ± 0.022 <sup>a</sup> | 0.565 ± 0.018 <sup>a</sup> | 0.508 ± 0.017 <sup>b</sup> | 0.492 ± 0.012 <sup>c</sup> | 0.631 ± 0.023 <sup>a</sup> | 0.511 ± 0.012 <sup>b</sup> | 0.348 ± 0.013 <sup>c</sup> | 0.312 ± 0.015 <sup>d</sup> |
| <b>0.20 % βME</b>              | 0.75 ± 0.037   | 0.615 ± 0.013 <sup>a</sup> | 0.425 ± 0.014 <sup>b</sup> | 0.201 ± 0.010 <sup>c</sup> | 0.165 ± 0.008 <sup>d</sup> | 0.557 ± 0.029 <sup>a</sup> | 0.537 ± 0.025 <sup>a</sup> | 0.455 ± 0.018 <sup>b</sup> | 0.401 ± 0.013 <sup>c</sup> | 0.675 ± 0.028 <sup>a</sup> | 0.511 ± 0.015 <sup>b</sup> | 0.467 ± 0.017 <sup>c</sup> | 0.411 ± 0.018 <sup>d</sup> |
| <b>Squeezed beetroot juice</b> |                |                            |                            |                            |                            |                            |                            |                            |                            |                            |                            |                            |                            |
|                                | <b>Initial</b> | <b>-19 °C</b>              |                            |                            |                            | <b>+ 4 °C</b>              |                            |                            |                            | <b>+ 25 °C</b>             |                            |                            |                            |
|                                |                | <b>2 days</b>              | <b>4 days</b>              | <b>6 days</b>              | <b>8 days</b>              | <b>2 days</b>              | <b>4 days</b>              | <b>6 days</b>              | <b>8 days</b>              | <b>2 days</b>              | <b>4 days</b>              | <b>6 days</b>              | <b>8 days</b>              |
| <b>10 mM DTT</b>               | 0.69 ± 0.035   | 0.850 ± 0.039 <sup>a</sup> | 0.643 ± 0.025 <sup>b</sup> | 0.400 ± 0.015 <sup>c</sup> | 0.336 ± 0.012 <sup>d</sup> | 0.543 ± 0.026 <sup>a</sup> | 0.489 ± 0.018 <sup>b</sup> | 0.479 ± 0.015 <sup>b</sup> | 0.252 ± 0.009 <sup>c</sup> | 0.556 ± 0.017 <sup>a</sup> | 0.520 ± 0.015 <sup>b</sup> | 0.418 ± 0.017 <sup>c</sup> | 0.390 ± 0.018 <sup>c</sup> |
| <b>15 mM DTT</b>               | 0.69 ± 0.035   | 0.822 ± 0.041 <sup>a</sup> | 0.465 ± 0.019 <sup>b</sup> | 0.294 ± 0.015 <sup>c</sup> | 0.267 ± 0.012 <sup>c</sup> | 0.533 ± 0.020 <sup>a</sup> | 0.428 ± 0.013 <sup>b</sup> | 0.407 ± 0.010 <sup>b</sup> | 0.384 ± 0.011 <sup>c</sup> | 0.738 ± 0.025 <sup>a</sup> | 0.548 ± 0.023 <sup>b</sup> | 0.400 ± 0.018 <sup>c</sup> | 0.396 ± 0.016 <sup>d</sup> |
| <b>20 mM DTT</b>               | 0.69 ± 0.035   | 0.717 ± 0.030 <sup>a</sup> | 0.513 ± 0.021 <sup>b</sup> | 0.467 ± 0.023 <sup>c</sup> | 0.432 ± 0.012 <sup>c</sup> | 0.458 ± 0.017 <sup>a</sup> | 0.456 ± 0.014 <sup>a</sup> | 0.407 ± 0.016 <sup>b</sup> | 0.285 ± 0.012 <sup>c</sup> | 0.810 ± 0.028 <sup>a</sup> | 0.495 ± 0.021 <sup>b</sup> | 0.445 ± 0.012 <sup>c</sup> | 0.417 ± 0.011 <sup>d</sup> |
| <b>0.05 % βME</b>              | 0.69 ± 0.035   | 0.532 ± 0.024 <sup>a</sup> | 0.462 ± 0.022 <sup>b</sup> | 0.367 ± 0.015 <sup>c</sup> | 0.238 ± 0.012 <sup>d</sup> | 0.567 ± 0.020 <sup>a</sup> | 0.491 ± 0.012 <sup>b</sup> | 0.375 ± 0.013 <sup>c</sup> | 0.287 ± 0.008 <sup>d</sup> | 0.478 ± 0.010 <sup>a</sup> | 0.476 ± 0.015 <sup>a</sup> | 0.444 ± 0.016 <sup>b</sup> | 0.200 ± 0.010 <sup>c</sup> |
| <b>0.10 % βME</b>              | 0.69 ± 0.035   | 0.556 ± 0.023 <sup>a</sup> | 0.542 ± 0.021 <sup>a</sup> | 0.495 ± 0.020 <sup>b</sup> | 0.448 ± 0.017 <sup>c</sup> | 0.595 ± 0.024 <sup>a</sup> | 0.508 ± 0.021 <sup>b</sup> | 0.332 ± 0.013 <sup>c</sup> | 0.267 ± 0.090 <sup>d</sup> | 0.601 ± 0.023 <sup>a</sup> | 0.587 ± 0.020 <sup>a</sup> | 0.366 ± 0.017 <sup>b</sup> | 0.245 ± 0.012 <sup>c</sup> |

|                                        |                     |                                   |                                   |                                   |                                   |                                   |                                   |                                   |                                   |                                   |                                   |                                   |                                   |
|----------------------------------------|---------------------|-----------------------------------|-----------------------------------|-----------------------------------|-----------------------------------|-----------------------------------|-----------------------------------|-----------------------------------|-----------------------------------|-----------------------------------|-----------------------------------|-----------------------------------|-----------------------------------|
| <b>0.20 &amp; <math>\beta</math>ME</b> | 0.69 $\pm$<br>0.035 | 0.651 $\pm$<br>0.033 <sup>a</sup> | 0.447 $\pm$<br>0.024 <sup>b</sup> | 0.303 $\pm$<br>0.016 <sup>c</sup> | 0.290 $\pm$<br>0.011 <sup>c</sup> | 0.573 $\pm$<br>0.025 <sup>a</sup> | 0.434 $\pm$<br>0.020 <sup>b</sup> | 0.198 $\pm$<br>0.008 <sup>c</sup> | 0.356 $\pm$<br>0.011 <sup>d</sup> | 0.537 $\pm$<br>0.026 <sup>a</sup> | 0.497 $\pm$<br>0.020 <sup>b</sup> | 0.363 $\pm$<br>0.019 <sup>c</sup> | 0.268 $\pm$<br>0.011 <sup>d</sup> |
|----------------------------------------|---------------------|-----------------------------------|-----------------------------------|-----------------------------------|-----------------------------------|-----------------------------------|-----------------------------------|-----------------------------------|-----------------------------------|-----------------------------------|-----------------------------------|-----------------------------------|-----------------------------------|

Results are expressed as mean  $\pm$  standard deviation (n = 3). Different letters in each row indicate a difference at a significance level of  $p = 0.05$ .
